# Supplementary material
Source: publisher figshare collection journal article supplement (https://sage.figshare.com/ndownloader/files/20225316)

# PG-HACKER Score

MACCE cumulative incidence for Diabetic Patients post-MI

|                           |            |
|---------------------------|------------|
| Age                       | 50         |
| Gender                    | Male       |
| LVEF                      | >51%       |
| Peripheral artery disease | No         |
| Previous CHF              | No         |
| Killip class              | I (no CHF) |
| Optimal medical treatment | No         |

Points = 6

## MACCE incidence

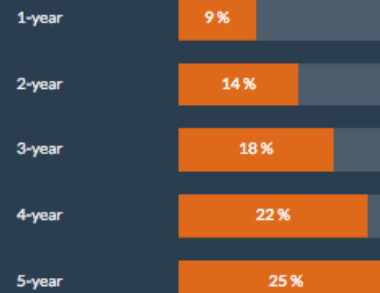

Evidence 

Pen & Paper Calculation 

Incidence Table 

## The PG-HACKER registry

A cohort of 1400 diabetic patients who were admitted due to acute coronary syndrome (ACS), between Nov 2003 and Jan 2017.

They were followed for MACCE events and all-cause mortality.

### Definitions:

- MACCE event: either cardiovascular mortality, new myocardial ischemia, sudden cardiac death, cerebrovascular accident or heart failure episode.
- ACS: was defined by the presence of typical clinical symptoms of chest pain and electrocardiographic changes indicative of myocardial ischemia/lesion and/or elevation of serum markers of myocardial damage [Ibanez, 2018].
- LVEF: left ventricle ejection fraction was coded in: no dysfunction (LVEF > 51%) mild (LVEF 41-51%), moderate (LVEF 30-40%) or severe dysfunction (<30%) [Lang, 2015].
- OMT: was defined as the joint implementation of these four treatments: antiplatelets, statins, betablockers and angiotensin-converter enzyme inhibitors or mineralocorticoid receptor antagonists (MRAs).

### Outcomes:

- 783 patients suffered a MACCE event, from which 417 patients died.
- 143 patients died from non-cardiovascular causes.

### Statistical rationale:

- The PG-HACKER score is based in a Fine & Gray model for competing risks.
- A competing risk (CR) is an event whose occurrence either precludes the occurrence of another event under examination or fundamentally alters the probability of occurrence of this other event.
- Kaplan-Meier methods are not suitable for modeling CRs, as they tend to overestimate incidence.
- Fine & Gray models have use in predicting an individual's incidence of an event (MACCE), taking into account the possibility that a competing event (all-cause mortality) occurs.
- The point-based score transforms the time-to-event model into a simple set of operations, to facilitate its use in the clinical setting.

# PG-HACKER Score

MACCE cumulative incidence for Diabetic Patients post-MI

|                             |            |
|-----------------------------|------------|
| 📅 Age                       | 50         |
| 👤 Gender                    | Male       |
| 📶 LVEF                      | >51%       |
| 🦶 Peripheral artery disease | No         |
| ❤️ Previous CHF             | No         |
| 📶 Killip class              | I (no CHF) |
| 🏥 Optimal medical treatment | No         |

Points = 6

## MACCE incidence

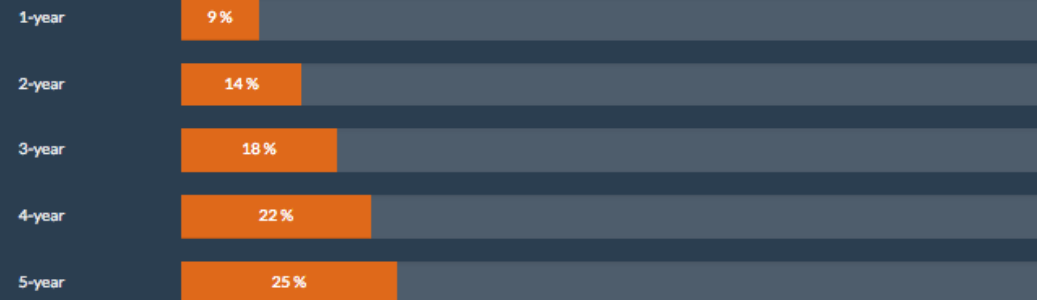

Evidence 📖

Pen & Paper Calculation ✎

Incidence Table 📊

Age 📅

- Option 1: add 1 point every 5 years, starting from age 20 to 95.
- Option 2: points = (age - 20)/5 (rounded to floor).
- Range: 0-15 points.

Gender 👤

- Female: -1 point.
- Male: 0 points.

Previous CHF ❤️

- 1 point if diagnosed.

LVEF 📶

- $\geq 51\%$ : 0 points.
- 41-51%: 1 point.
- $\leq 40\%$ : 2 points.

Peripheral artery disease 🦶

- 1 point if diagnosed.

Killip class 📶

- Killip I: 0 points.
- Killip II: 1 point.
- Killip III: 2 points.
- Killip IV: 3 points.

Optimal Medical Treatment 🏥

- -1 point if treated.

Abbreviations: LVEF=left ventricle ejection fraction.

# PG-HACKER Score

MACCE cumulative incidence for Diabetic Patients post-MI

Age: 50

Gender: Male

LVEF: >51%

Peripheral artery disease: No

Previous CHF: No

Killip class: I (no CHF)

Optimal medical treatment: No

Points = 6

## MACCE incidence

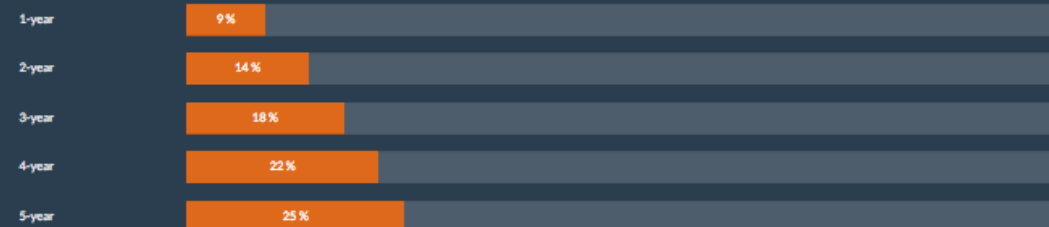

Evidence  Pen & Paper Calculation  Incidence Table 

| Points | CIF 01 year | CIF 02 year | CIF 03 year | CIF 04 year | CIF 05 year | CIF 10 year |
|--------|-------------|-------------|-------------|-------------|-------------|-------------|
| -2     | 0.03        | 0.04        | 0.06        | 0.07        | 0.08        | 0.16        |
| -1     | 0.03        | 0.05        | 0.07        | 0.08        | 0.09        | 0.18        |
| 0      | 0.04        | 0.06        | 0.08        | 0.09        | 0.11        | 0.21        |
| 1      | 0.04        | 0.07        | 0.09        | 0.11        | 0.12        | 0.24        |
| 2      | 0.05        | 0.08        | 0.10        | 0.12        | 0.14        | 0.27        |
| 3      | 0.06        | 0.09        | 0.12        | 0.14        | 0.17        | 0.31        |
| 4      | 0.07        | 0.10        | 0.14        | 0.16        | 0.19        | 0.35        |
| 5      | 0.08        | 0.12        | 0.16        | 0.19        | 0.22        | 0.39        |
| 6      | 0.09        | 0.14        | 0.18        | 0.22        | 0.25        | 0.44        |
| 7      | 0.11        | 0.16        | 0.21        | 0.25        | 0.28        | 0.49        |
| 8      | 0.12        | 0.18        | 0.23        | 0.28        | 0.32        | 0.55        |
| 9      | 0.14        | 0.21        | 0.27        | 0.32        | 0.36        | 0.60        |
| 10     | 0.16        | 0.24        | 0.30        | 0.36        | 0.41        | 0.66        |
| 11     | 0.19        | 0.28        | 0.34        | 0.41        | 0.46        | 0.71        |
| 12     | 0.21        | 0.31        | 0.39        | 0.46        | 0.51        | 0.77        |
| 13     | 0.24        | 0.35        | 0.44        | 0.51        | 0.56        | 0.82        |
| 14     | 0.28        | 0.40        | 0.49        | 0.56        | 0.62        | 0.86        |
| 15     | 0.32        | 0.45        | 0.54        | 0.62        | 0.68        | 0.90        |
| 16     | 0.36        | 0.50        | 0.60        | 0.67        | 0.73        | 0.93        |
| 17     | 0.40        | 0.55        | 0.65        | 0.73        | 0.78        | 0.96        |
| 18     | 0.45        | 0.61        | 0.71        | 0.78        | 0.83        | 0.97        |
| 19     | 0.51        | 0.67        | 0.76        | 0.83        | 0.88        | 0.99        |
| 20     | 0.56        | 0.72        | 0.81        | 0.87        | 0.91        | 0.99        |
| 21     | 0.62        | 0.77        | 0.86        | 0.91        | 0.94        | 1.00        |
| 22     | 0.67        | 0.82        | 0.90        | 0.94        | 0.96        | 1.00        |

CIF: cumulative incidence function for MACCE, or expected MACCE incidence at a given timepoint.

# PG-HACKER Score

MACCE cumulative incidence for Diabetic Patients  
post-MI

|                                                                                                             |                                         |
|-------------------------------------------------------------------------------------------------------------|-----------------------------------------|
|  Age                       | <input type="text" value="50"/>         |
|  Gender                    | <input type="text" value="Male"/>       |
|  LVEF                      | <input type="text" value="&gt;51%"/>    |
|  Peripheral artery disease | <input type="text" value="No"/>         |
|  Previous CHF              | <input type="text" value="No"/>         |
|  Killip class              | <input type="text" value="I (no CHF)"/> |
|  Optimal medical treatment | <input type="text" value="No"/>         |

Points = 6

## MACCE incidence

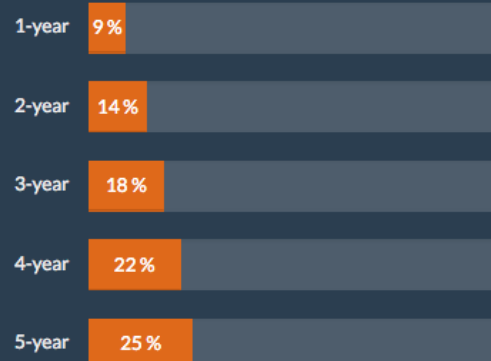

Supplement: Supplementary file 1 [file 20225316]
